# Supplementary material for: Auxin Metabolome Profiling in the Arabidopsis Endoplasmic Reticulum Using an Optimised Organelle Isolation Protocol
Source: MDPI journal article supplement (doi:10.3390/ijms22179370), 2021-08-29
Supplement: s1 [file s1]

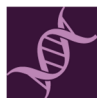

*Supplementary materials*

# Auxin Metabolome Profiling in the Arabidopsis Endoplasmic Reticulum Using an Optimised Organelle Isolation Protocol

Ludmila Včelařová †, Vladimír Skalický †, Ivo Chamrád, René Lenobel, Martin F. Kubeš ‡, Aleš Pěňčík \*  
and Ondřej Novák

Laboratory of Growth Regulators, Institute of Experimental Botany of the Czech Academy of Sciences, and Faculty of Science, Palacký University, Šlechtitelů 27, CZ-78371 Olomouc, Czech Republic; ludmila.vcelarova@upol.cz (L.V.); vladimir.skalicky@upol.cz (V.S.); ivo.chamrad@upol.cz (I.C.); rene.lenobel@upol.cz (R.L.); martin.kubes@uhk.cz (M.F.K.); ondrej.novak@upol.cz (O.N.).

\* Correspondence: ales.pencik@upol.cz; Tel.: +420-585-634-853

† These authors contributed equally to this work.

‡ Current address: Department of Biology, Faculty of Science, University of Hradec Králové, Rokitsanského 62, 500 03 Hradec Králové, Czech Republic.

**Citation:** Včelařová, L.; Skalický, V.; Chamrád, I.; Lenobel, R.; Kubeš, M.F.; Pěňčík, A.; Novák, O. Auxin Metabolome Profiling in the Arabidopsis Endoplasmic Reticulum Using an Optimised Organelle Isolation Protocol. *Int. J. Mol. Sci.* **2021**, *22*, 9370. <https://doi.org/10.3390/ijms22179370>

Academic Editor: Jutta Ludwig-Mueller

Received: 31 July 2021

Accepted: 25 August 2021

Published: 29 August 2021

**Publisher's Note:** MDPI stays neutral with regard to jurisdictional claims in published maps and institutional affiliations.

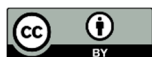

**Copyright:** © 2021 by the authors. Submitted for possible open access publication under the terms and conditions of the Creative Commons Attribution (CC BY) license (<http://creativecommons.org/licenses/by/4.0/>).

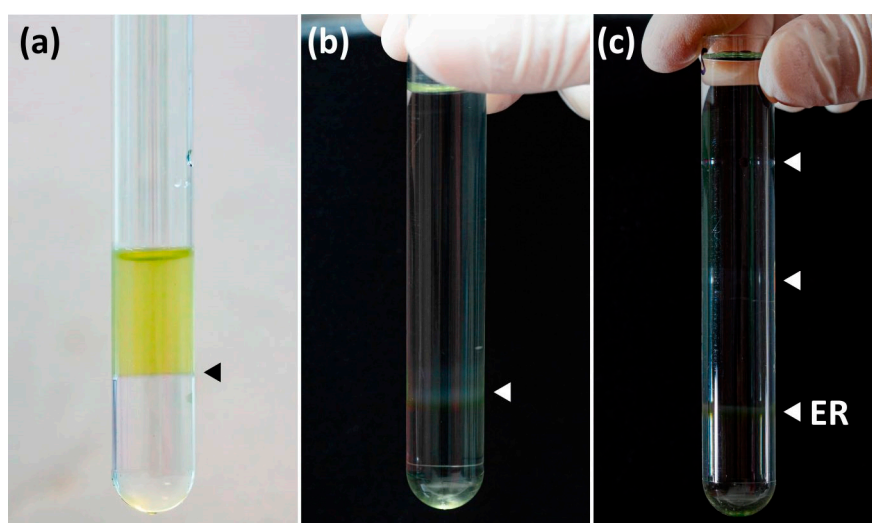

**Figure S1.** Procedure for isolating the ER-enriched fraction by density gradient ultracentrifugation. (a) A supernatant S4,000 loaded on the top of 31% (w/w) sucrose solution. (b) A two-step density gradient after ultracentrifugation. The supernatant was removed and focused microsomes were overlaid with 27%, 19%, and 8% (w/w) sucrose solutions. (c) A four-step gradient after the final ultracentrifugation. The 27/31% interface enriched with ER microsomes was collected. Arrows indicate interphases between the two gradient-forming solutions, ER – endoplasmic reticulum-enriched fraction.

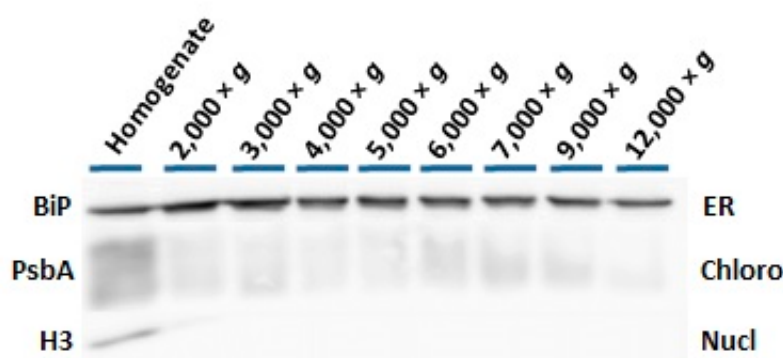

**Figure S2.** Elimination of co-migrating chloroplasts by optimizing the initial centrifugation prior to density-gradient separation. The crude homogenate was centrifuged at speeds between 2,000 and 12,000  $\times g$ . The parent homogenate and the resulting supernatants were then subjected to Western blot analysis. The following organelle-specific markers were immunodetected: endoplasmic reticulum – ER (Lumena-binding protein, BiP), chloroplasts – Chloro (D1 protein of photosystem II, PsbA) and nuclei – Nucl (Histone 3, H3).

| Isolation   |             |             |             |             |             |
|-------------|-------------|-------------|-------------|-------------|-------------|
| Replicate 1 | Replicate 1 |             |             |             |             |
| Replicate 2 | 74.40       | Replicate 2 |             |             |             |
| Replicate 3 | 76.40       | 76.80       | Replicate 3 |             |             |
| Replicate 4 | 76.70       | 74.00       | 73.00       | Replicate 4 |             |
| Replicate 5 | 68.20       | 67.00       | 71.90       | 69.70       | Replicate 5 |

**Figure S3.** Reproducibility of ER isolations visualized using a histogram showing pairwise comparisons of protein identifications (in %).

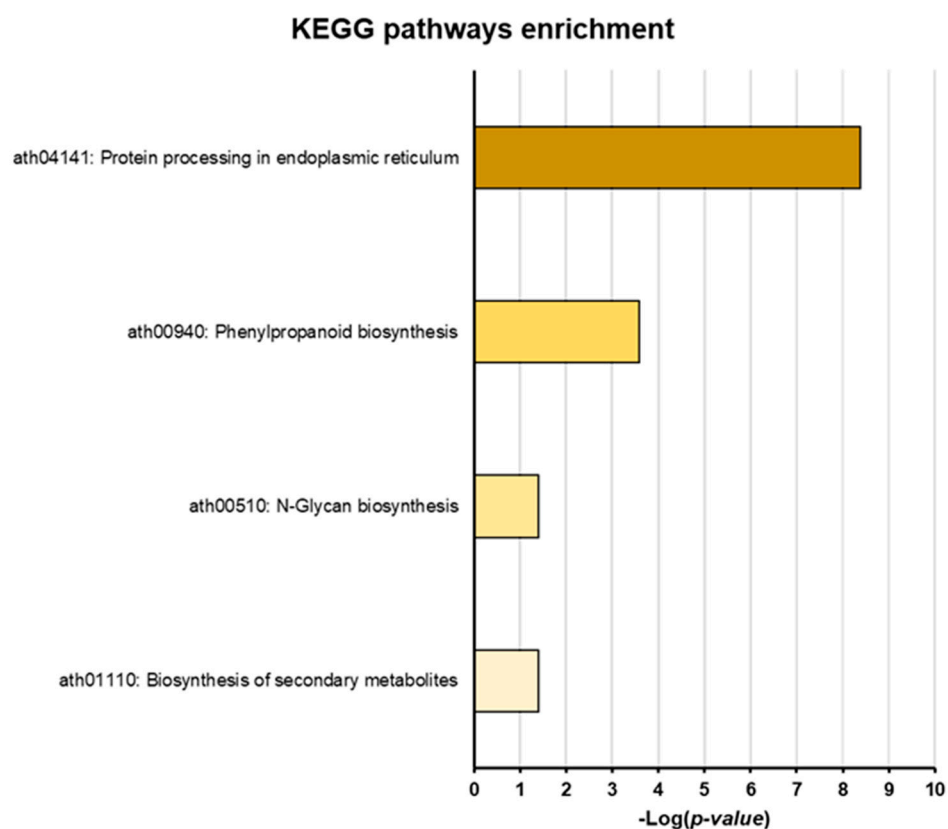

**Figure S4.** KEGG pathway enrichment analysis. Significantly enriched KEGG pathways are sorted according to the  $-\text{Log}$  of their  $p$ -value.

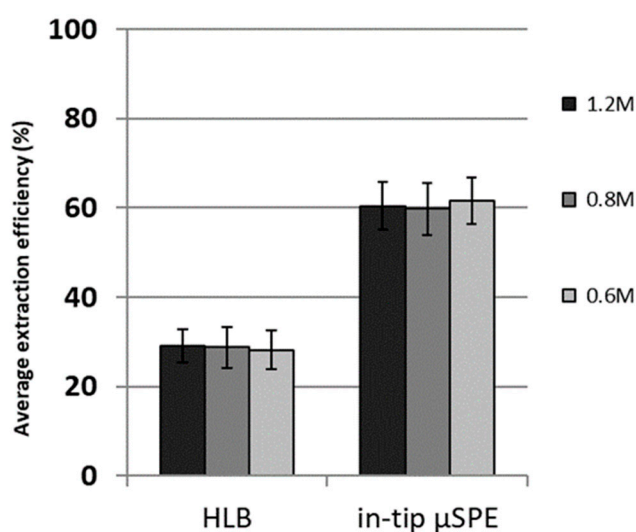

**Figure S5.** Total process efficiency (%) of solid-phase extraction (SPE) protocols. The recovery achieved using a conventional HLB column [1] was compared to that for an in-tip  $\mu$ SPE protocol [2]. Gradient-forming sucrose solutions were spiked with a mixture of six auxin standards (1 pmol each). Recoveries of standards were evaluated by LC-MS/MS. Values are mean recoveries (%) of all tested auxin standards ( $n=3$ ). Error bars indicate the s. d.

**Tables S1–S4.** Tables are available in attached in zip file.

**Table S1.** Protein and peptide identification characteristics for analyses of ER isolates and control samples (n=5 for both) as provided by MaxQuant software version 1.6.10.43 [3].

**Table S2.** A list of all identified proteins assigned as ER-located.

**Table S3.** Complete functional annotation clustering results for the proteins assigned as ER-located, as downloaded from DAVID Bioinformatics Resources 6.8 [4].

**Table S4.** Complete results of a KEGG pathways enrichment analysis for the proteins assigned as ER-located as downloaded from DAVID Bioinformatics Resources 6.8 [4].

**Table S5.** Levels of IAA metabolites levels and their relative abundance in Arabidopsis seedlings, an organelle suspension, and the ER-enriched fraction. Values are mean (n=5).

| Compound          | Crude extract        |      | Organelle suspension |      | ER fraction        |      |
|-------------------|----------------------|------|----------------------|------|--------------------|------|
|                   | ( <i>pmol/g FW</i> ) | (%)  | ( <i>fmol/ml</i> )   | (%)  | ( <i>fmol/ml</i> ) | (%)  |
| IAA               | 102.1                | 1.7  | 11,451.4             | 4.8  | 832.3              | 8.8  |
| IAA <sub>sp</sub> | 25.1                 | 0.4  | 2,265.7              | 1.0  | 15.5               | 0.2  |
| IA <sub>Glu</sub> | 100.3                | 1.7  | 9,835.0              | 4.1  | 111.0              | 1.2  |
| IAA-glc           | 78.2                 | 1.3  | 8,883.5              | 3.7  | 118.3              | 1.2  |
| oxIAA             | 909.2                | 15.6 | 36,105.3             | 15.2 | 975.6              | 10.3 |
| oxIAA-glc         | 4,629.0              | 79.2 | 168,948.3            | 71.1 | 7,455.4            | 78.4 |

**Table S6.** Endogenous levels (fmol/μg of proteins) of auxin metabolites in the Arabidopsis crude extract and ER-enriched fraction. The mean abundance ± s.d. is given (n=5) for indole-3-acetic acid (IAA), IAA-aspartate (IAA<sub>sp</sub>), IAA-glutamate (IA<sub>Glu</sub>), IAA-glucose (IAA-glc), 2-oxoindole-3-acetic acid (oxIAA), oxIAA-glucose (oxIAA-glc)

| Compound          | Crude extract              | ER fraction       |
|-------------------|----------------------------|-------------------|
|                   | <i>fmol/μg of proteins</i> |                   |
| IAA               | 11.7 ± 0.9                 | 718.1 ± 34.0      |
| IAA <sub>sp</sub> | 2.9 ± 0.1                  | 13.3 ± 2.7        |
| IA <sub>Glu</sub> | 11.5 ± 0.9                 | 95.7 ± 18.3       |
| IAA-glc           | 8.9 ± 0.8                  | 102.0 ± 16.6      |
| oxIAA             | 103.9 ± 10.8               | 841.7 ± 150.0     |
| oxIAA-glc         | 529.0 ± 13.7               | 6,432.1 ± 1,244.9 |

## References

- Novák, O.; Hényková, E.; Sairanen, I.; Kowalczyk, M.; Pospíšil, T.; Ljung, K. Tissue-specific profiling of the Arabidopsis thaliana auxin metabolome. *Plant J.* **2012**, *72*, 523–36, doi:10.1111/j.1365-3113.2012.05085.x.
- Pěňčík, A.; Casanova-Sáez, R.; Pilařová, V.; Žukauskaitė, A.; Pinto, R.; Luis Micol, J.; Ljung, K.; Novák, O. Ultra-rapid auxin metabolite profiling for high-throughput mutant screening in Arabidopsis. *J. Exp. Bot.* **2018**, *69*, 2569–2579, doi:10.1093/jxb/ery084.

3. Tyanova, S.; Temu, T.; Cox, J. The MaxQuant computational platform for mass spectrometry-based shotgun proteomics. *Nat. Protoc.* **2016**, *11*, 2301–2319, doi:10.1038/nprot.2016.136.
4. Huang, D. W.; Sherman, B. T.; Lempicki, R. A. Systematic and integrative analysis of large gene lists using DAVID bioinformatics resources. *Nat. Protoc.* **2009**, *4*, 44–57, doi:10.1038/nprot.2008.211.
